# Supplementary material
Source: Springer Nature journal article supplement (https://www.springermedizin.de/resource/supplementary/12958_2014_1234_MOESM3_ESM.pdf/9567118)

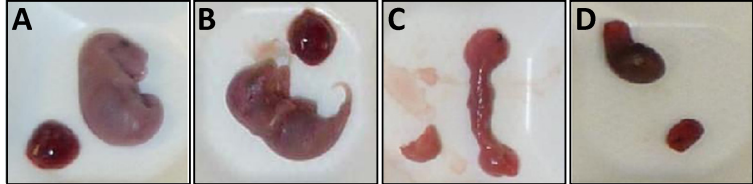

**E**

|           | Fetal viability (%) |         | Fetuses with organ defect (%) |      |
|-----------|---------------------|---------|-------------------------------|------|
|           | Ctrl                | Test    | Ctrl                          | Test |
| <b>P1</b> | 92 ± 6              | 8 ± 14  | 14                            | NA*  |
| <b>P2</b> | 90 ± 7              | 59 ± 22 | 10                            | 50   |
| <b>P3</b> | 100 ± 0             | 27 ± 33 | 7                             | 46   |

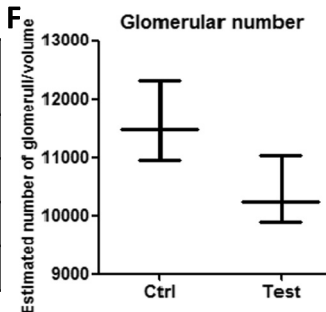

Supplement: MOESM3 [file 9567118]
